# Supplementary figures and images for: Nanopore Sequencing and Hi-C Based De Novo Assembly of Trachidermus fasciatus Genome
Source: MDPI journal article supplement (doi:10.3390/genes12050692), 2021-05-06

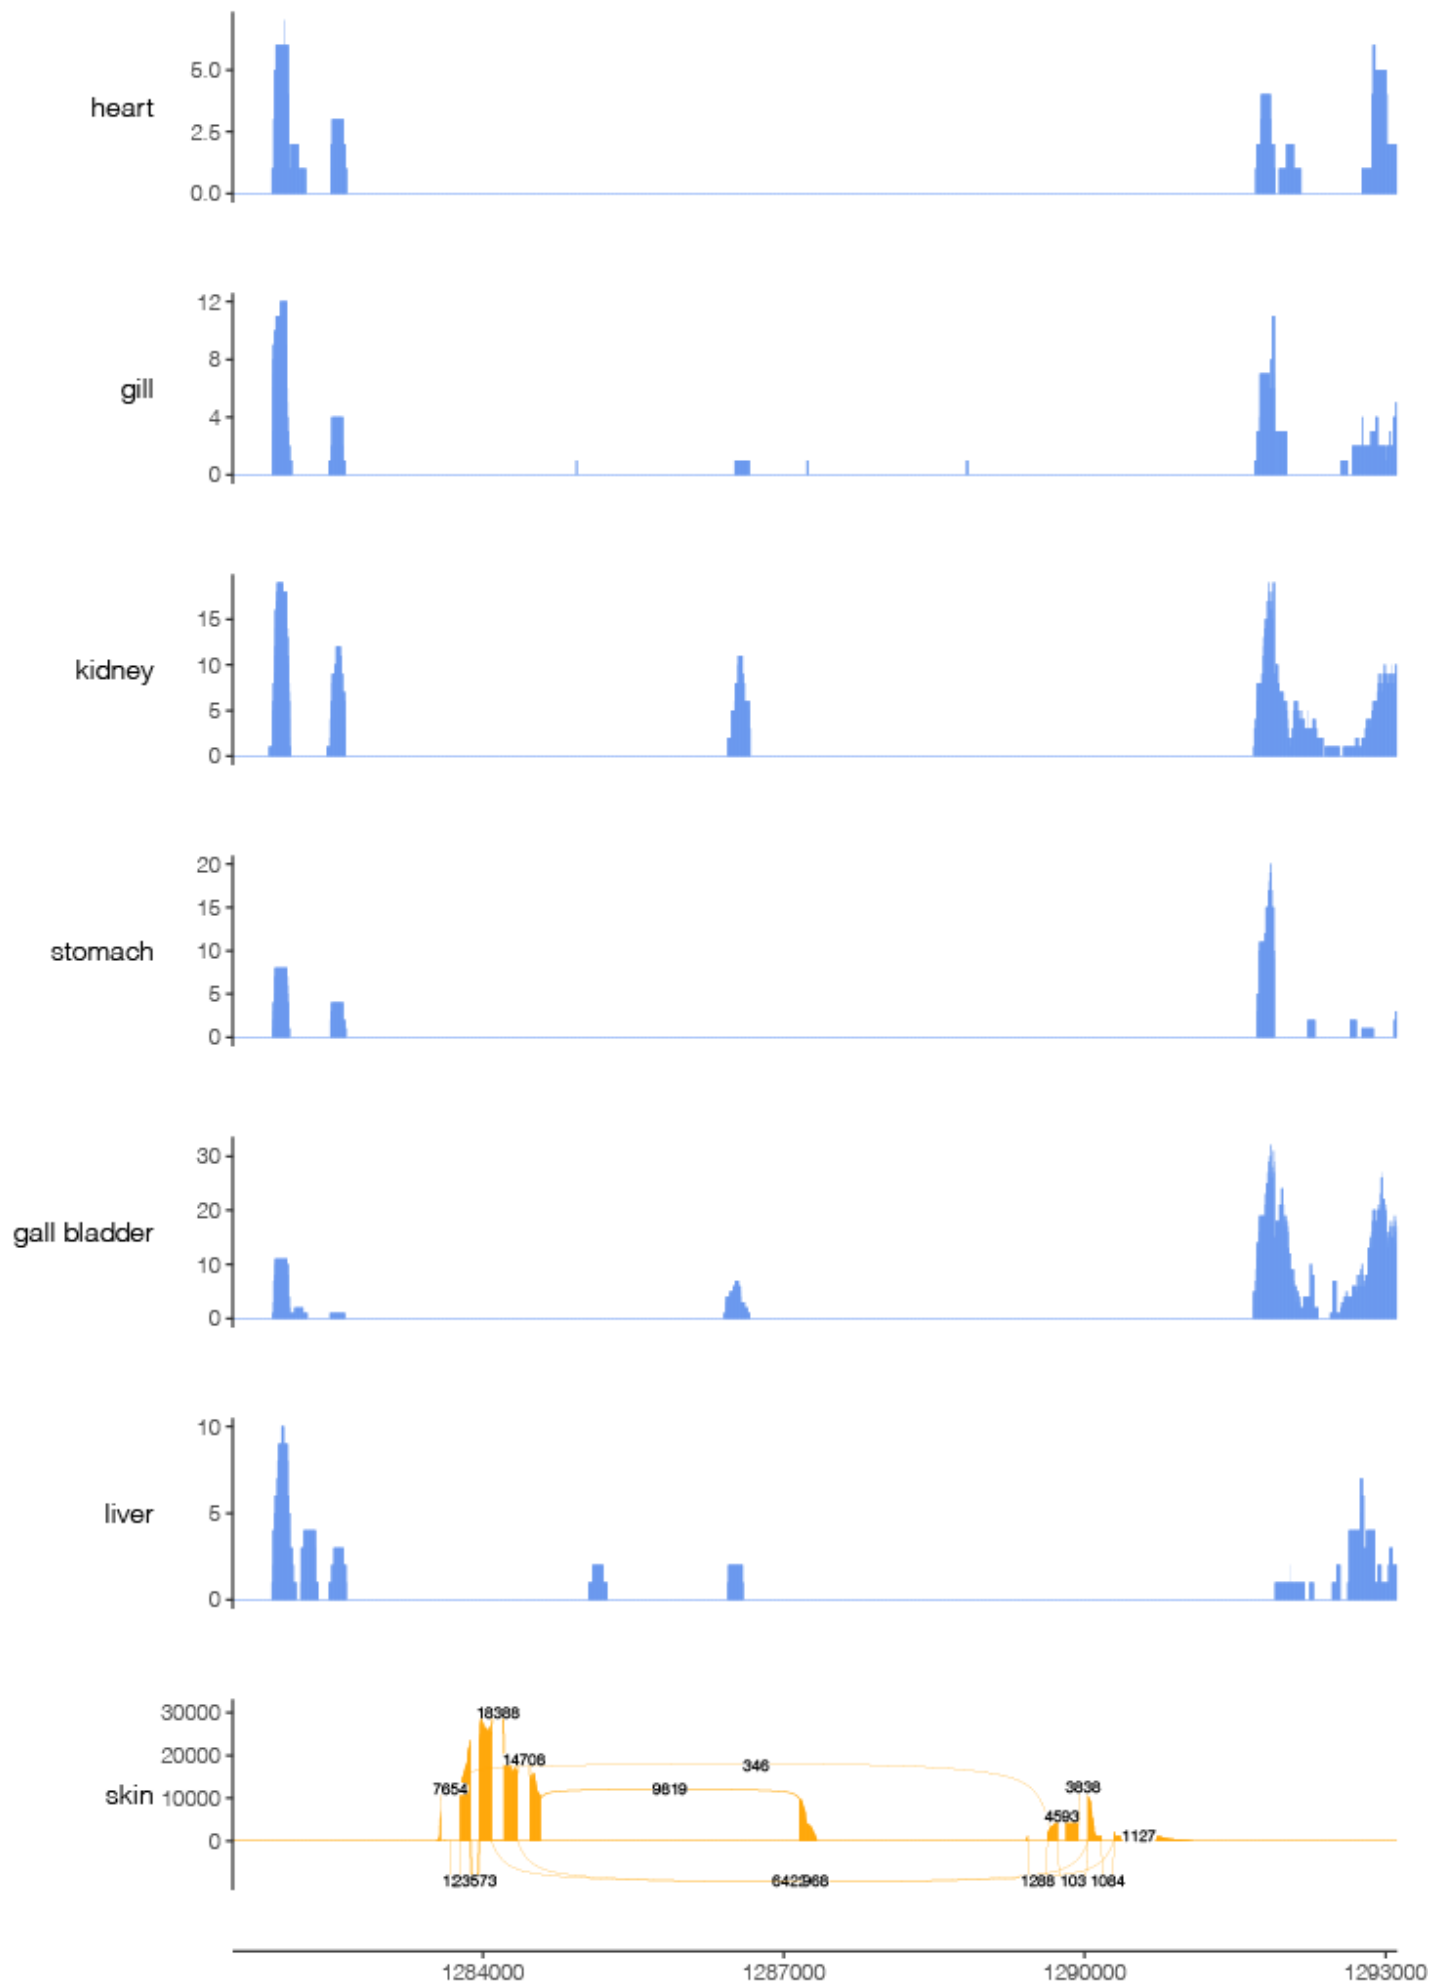

Trf.20428.3

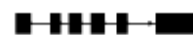

Trf.20428.2

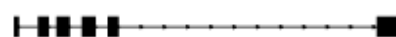

Trf.20428.1

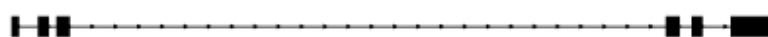

Supplement: s1 [file s1]

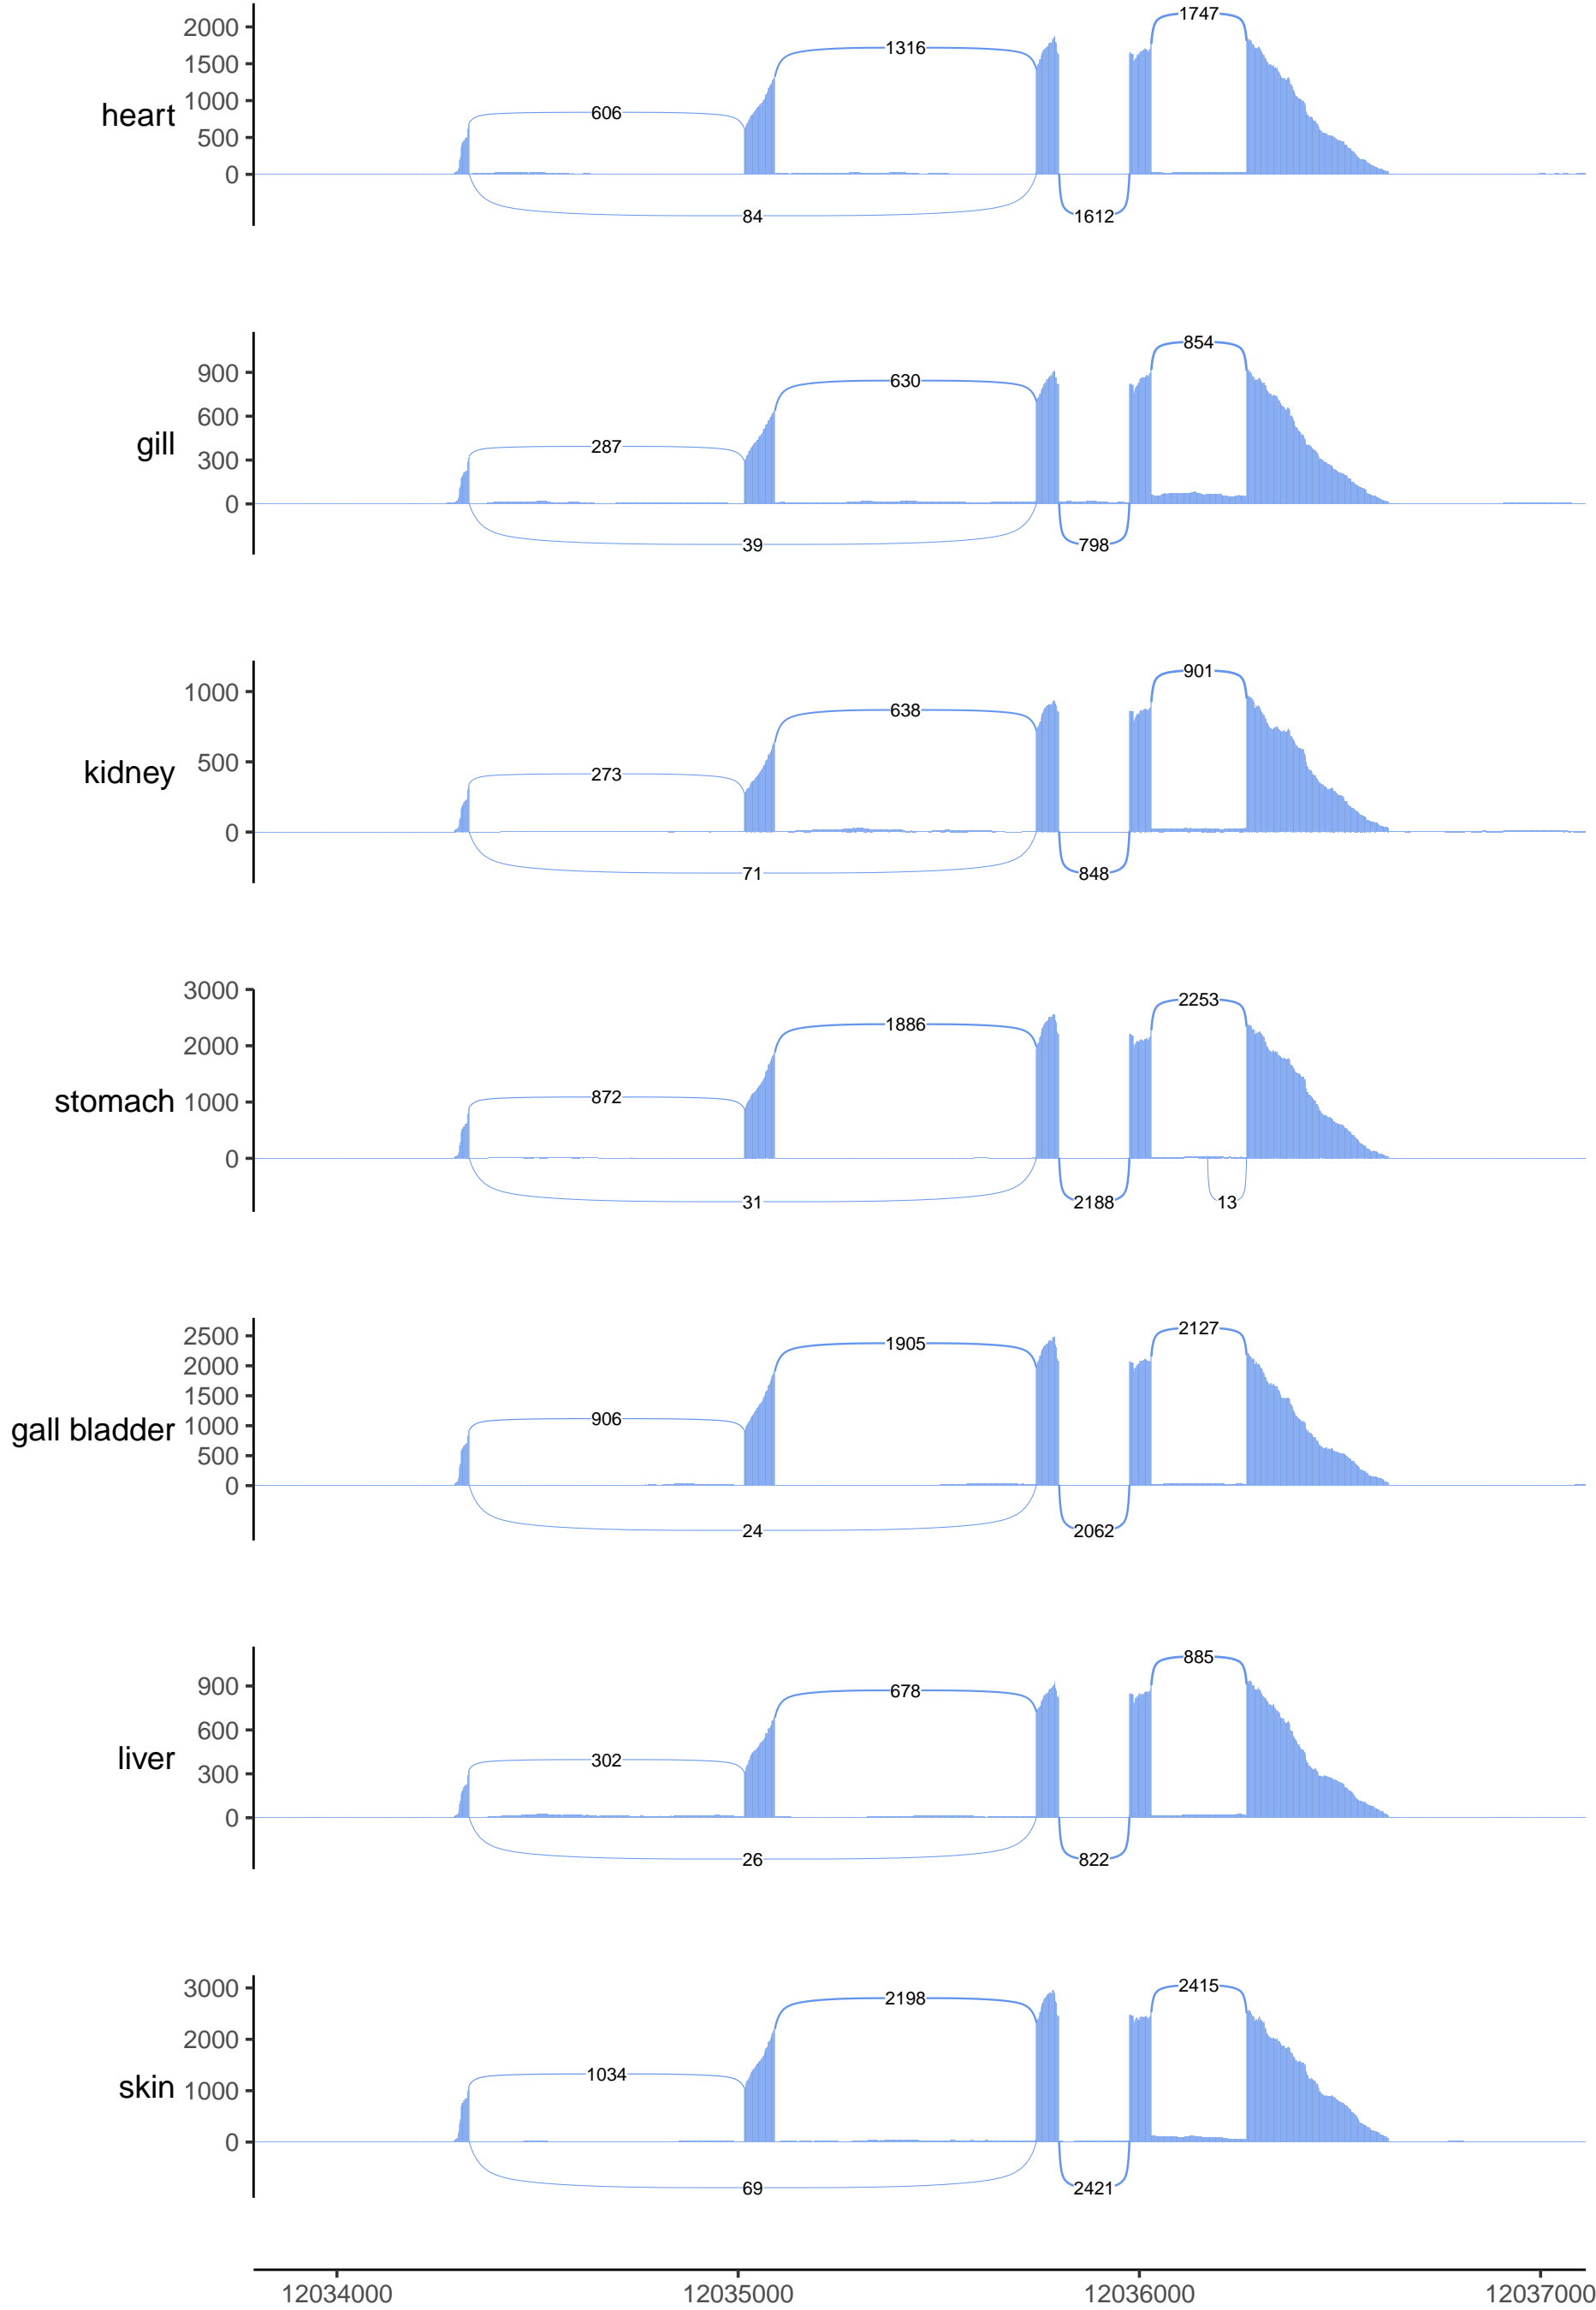

Trf.5711.1

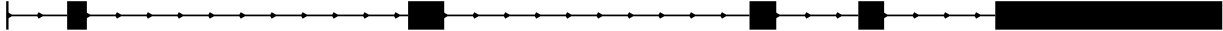

Supplement: s1 [file s1]

A

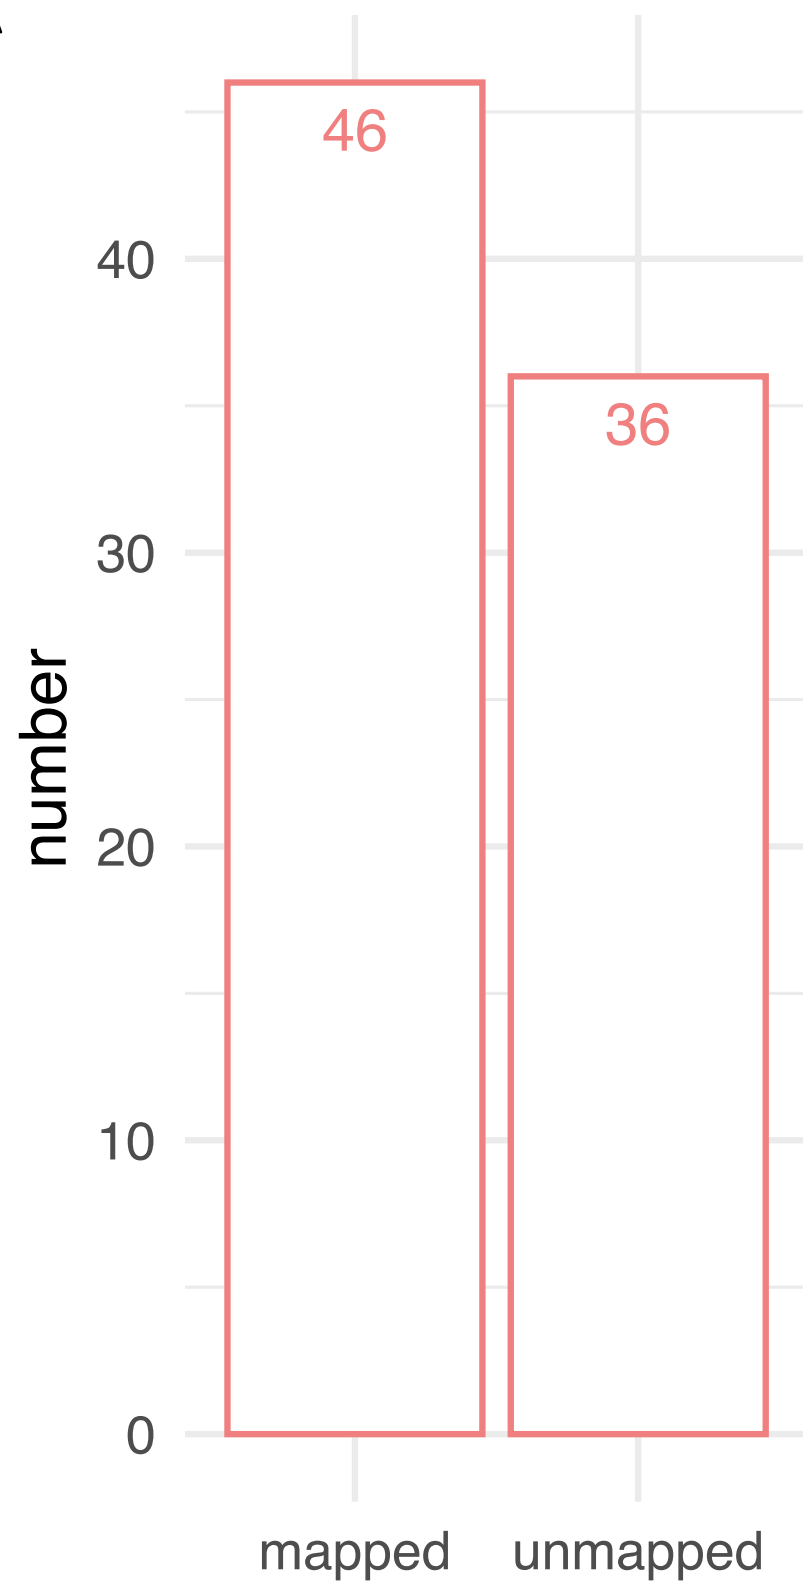

B

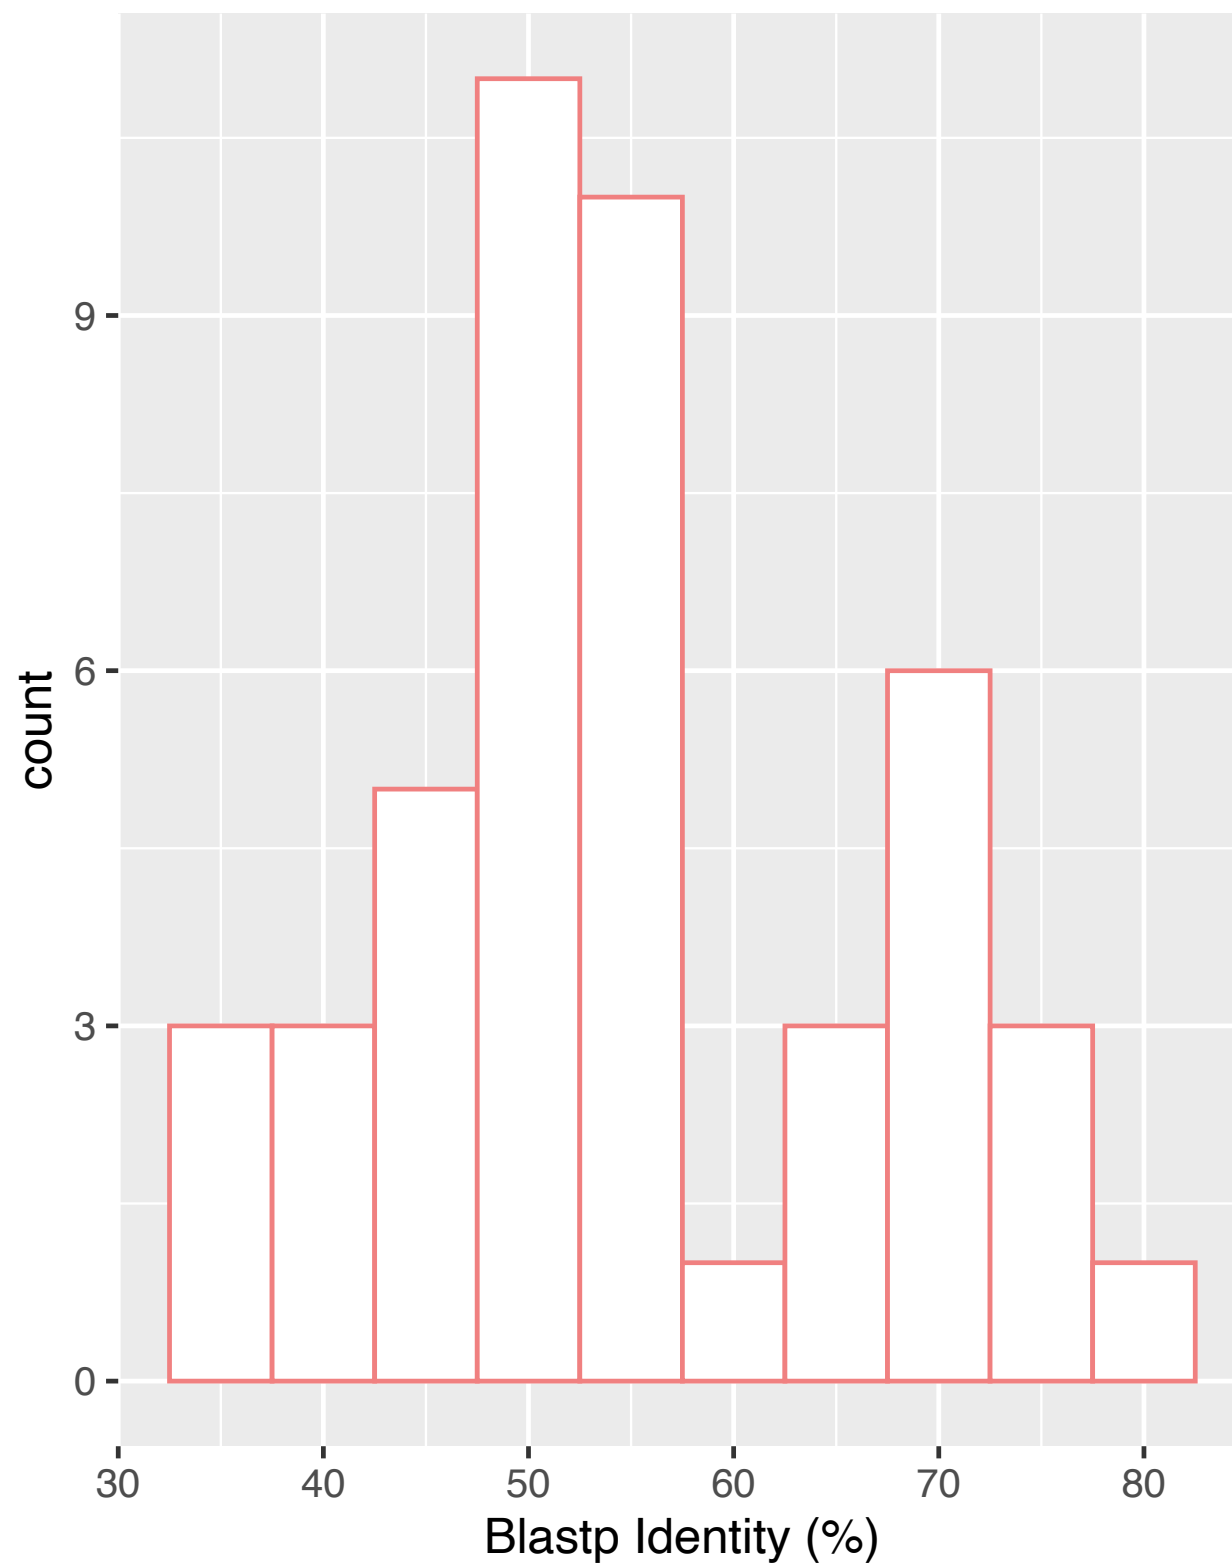

Supplement: s1 [file s1]
